# Supplementary material
Source: PubMed Central journal article supplement (PMC8329792)
Supplement: jamainternmed-e214075-s001.pdf [file jamainternmed-e214075-s001.pdf]

## Supplemental Online Content

Shenoy ES, Giuriato MA, Song Z. Prevalence, costs, and consequences of low-value preprocedural urinalyses in the US. *JAMA Intern Med*. Published online August 2, 2021. doi:10.1001/jamainternmed.2021.4075

**eTable.** Diagnosis Codes Denoting Plausibly Indicated Urinalyses

This supplemental material has been provided by the authors to give readers additional information about their work.

**eTable. Diagnosis Codes Denoting Plausibly Indicated Urinalyses**

| <b>Diagnosis</b>                                 | <b>ICD-9 Code</b>     | <b>ICD-9 Description</b>                                           | <b>ICD-10 Code</b> | <b>ICD-10 Description</b>                                                          |
|--------------------------------------------------|-----------------------|--------------------------------------------------------------------|--------------------|------------------------------------------------------------------------------------|
| Acute Cystitis                                   | 595.0                 | Acute Cystitis                                                     | N30.0              | Acute Cystitis                                                                     |
| Other Disorders of the Urethra or Urinary System | 599                   | Other disorders of the urethra and urinary tract                   | N36                | Other disorders of the urethra                                                     |
|                                                  | 596.55                | Detrusor sphincter dyssynergia                                     | N39                | Other disorders of the urinary system                                              |
|                                                  | 625.6                 | Stress incontinence, female                                        | N13.9              | Obstructive and reflux uropathy, unspecified                                       |
|                                                  | 788.31-788.39         | Urinary incontinence                                               | R31                | Hematuria                                                                          |
|                                                  |                       |                                                                    | B08.8              | Other specified viral infections characterized by skin and mucous membrane lesions |
| Urethritis                                       | 597                   | Urethritis, not sexually transmitted, and urethral syndrome        | N34                | Urethritis and urethral syndrome                                                   |
| Fever                                            | 780.60-780.63, 780.66 | Fever and other physiologic disturbances of temperature regulation | R50                | Fever of other and unknown origin                                                  |
| Dysuria                                          | 788.1                 | Dysuria                                                            | R30                | Pain associated with micturition                                                   |
|                                                  | 788.99                | Other symptoms involving urinary system                            |                    |                                                                                    |
| Altered Mental Status                            | 780.0                 | Alteration of consciousness                                        | R40                | Somnolence, stupor and coma                                                        |
|                                                  | 780.97                | Altered mental status                                              | R41.82             | Altered mental status, unspecified                                                 |
| Urinary frequency                                | 788.41                | Urinary frequency                                                  | R35.0              | Frequency of micturition                                                           |
| Urgency of urination                             | 788.63                | Urgency of urination                                               | R39.15             | Urgency of urination                                                               |
